# Supplementary material for: Minimum information about tolerogenic antigen-presenting cells (MITAP): a first step towards reproducibility and standardisation of cellular therapies
Source: PubMed Central journal article supplement (PMC5012269; doi:10.7717/peerj.2300), 2016-08-30
Supplement: peerj-04-2300-s002.pdf [file peerj-04-2300-s002.pdf]

must

should

may

## MITAP Checklist

### 1) Cells before

#### a) Essential information about the donor

##### *i) Species and strain*

Species

Strain (if applicable)

##### *ii) Characteristics of the organism*

Health

Age

Treatment/Environment

Individual identifier number

Source of purchase (if applicable)

#### b) Source of cell material

Organ, tissue, fluid or blood product

Source (if applicable)

Quantity (volume, size or weight)

Anti-coagulant (if applicable)

#### c) Cell separation process

Cell separation method

Equipment used

Tissue conditions between tissue retrieval and cell separation

Duration

Temperature

Fluid

Container

Purity of the cells after the separation process

Methodology

#### d) Phenotype

##### *i) Morphology*

Shape and appearance of cells

##### *ii) Cell surface and intracellular markers*

Molecules measured (using CD names)

Methodology

Stimulus and time of stimulation (if applicable)

**iii) Secreted molecules**

Molecules measured  
Methodology  
Stimulus and time of stimulation (if applicable)

**e) Cell numbers**

**i) Absolute cell number**

Total number of cells at the end of the isolation process  
Methodology

**ii) Viability**

Percentage of viable cells  
Methodology

## 2. Differentiation and induction of tolerogenicity (diff/tol)

**a) Pre-culture conditions**

Storage time  
Storage conditions  
If fresh  
Fluid  
Container  
Temperature  
If cryopreserved  
Freezing/thawing process  
Freezing medium  
Cell recovery & viability after thawing

**b) Culture conditions**

**i) Cell number**

The total number of cells put into culture

**ii) Cell concentration**

The number of cells per ml of medium at start of culture

**iii) Culture medium**

Type(s) of medium  
Source(s)  
Additives (excluding diff/tol agents)  
Source(s)  
Refreshment of the medium

**iv) Culture container**

Type of container  
Size  
Manufacturer  
Cell culture volume per container or well  
Total number of containers or wells

**v) Culture environment**

Temperature and CO2 concentration  
Use of pre-warmed medium  
Equipment

**c) Differentiation/induction of tolerogenicity (diff/tol) protocol**

Protocol  
Name of cytokine(s) or other agent(s) used  
Source  
Concentration  
Time-point(s) added to cell culture  
Total length of the culture period

**d) Antigen**

Name  
Source  
Concentration  
Time point(s) added to culture  
Carrier (if applicable)

**e) Storage**

Storage time  
Storage conditions  
If fresh  
Fluid  
Container  
Temperature  
If cryopreserved  
Freezing/thawing process  
Freezing medium  
Cell recovery & viability after thawing  
Time point at which cells are stored if different to the end of the culture process

**3. Cells after**

**a) Phenotype**

**i) Morphology**

Shape and appearance of cells

**ii) Cell surface and intracellular markers**

Molecules measured (using CD names)  
Methodology  
Stimulus and time of stimulation (if applicable)

must

should

may

**iii) Secreted molecules**

Molecules measured

Methodology

Stimulus and time of stimulation (if applicable)

**b) Cell behaviour**

Behaviour of cells in a functional assay

**c) Cell numbers**

**i) Absolute cell number**

Total number of cells at the end of the isolation process

Methodology

**ii) Viability**

Percentage of viable cells

Methodology

**4. About the protocol**

**a) Regulatory authority**

External authority that approved the protocol

Does protocol follow GMP?

**b) Purpose**

The reason for manufacturing the cells

**c) Relationship between the source organism for the cells  
and the target organism**

Allogeneic/Autologous/ Xenogeneic/Syngeneic

**d) Contact details**

Name(s) of the corresponding author(s)

Contact details of the corresponding author(s)
