# Supplementary material for: Minimum information about tolerogenic antigen-presenting cells (MITAP): a first step towards reproducibility and standardisation of cellular therapies
Source: PeerJ. 2016 Aug 30;4:e2300. doi: 10.7717/peerj.2300 (PMC5012269; doi:10.7717/peerj.2300)
Supplement: Supplemental Information 3 — The explanation for the dataset is given within the file, on the worksheet entitled ’Explanation data form responses’. [file peerj-04-2300-s003.xlsx]

## Sheet: Form responses
Participant		Q1: Xenogeneic	Q2: Adhesive	Q3: 37ºC in a 5% CO2 atmosphere	Q4: allogeneic	Q5: Rattus norvegicus	Q6: 0.5x10^6 cells/ml at start of culture	Q7: tetanus toxoid	Q8: Alloresponse	Q9: 90-95% viable by FACS (7-AAD/Annexin-5)	Q10: immunomagnetic separation	Q11: 200x10^6	Q12: On day 4, cells were treated with a cGMP cocktail (TNF-α (1000 U/ml), IL-1β (10 ng/ml) and PGE2 (1μM)	Q13: X-VIVO-15 with 2% autologous serum.	Q14: PBS and 2% human serum albumin for 2 hours	Q15: 1x10^7 by FACS	Q16: cells were frozen at -140°C for <6 months	Q17: peripheral blood	Q18: induction of tolerance in autoimmunity	Q19: migration to CCL21 in 96 transwell plate	Q20: 90% DAPI-negative cells	Q21: adherent via long or short protrusions	Q22: IL-10 (ELISA)	Q23: 4x10^7	Q24: Cell extraction and start differentiation/tolerization process is performed at the same day	Q25: Miltenyi cell differentiation bags 500 ml	Q26: 1 ml of culture medium/well	Q27: CD86	Q28: Spanish regulatory agency (AEMPS)	Q29: 80 cm2 culture flask	Q30: IMDM and 5% FSC, penicillin & streptomycin (5.10^4 U) and 50 µM 2-ME	Q31: 5x10^7	Q32: Cells are kept on ice in PBS for < 2 hours prior to injection	Q33: CMV (Cytomegalovirus)	Q34: mice were obtained from Jackson Laboratories	Q35: CD11c	Q36: Approved by Dutch Central Committee on Research Involving Human Subjects	Q37: age	Q38: TNF-a (ELISA)	Q39: CO2 incubator	Q40: Adherence to plastic, 2h at 37ºC.	Q41: Introduce IL-10 on day five	Q42: arrest the autoimmune attack to the insulin producing cells in type 1 diabetes.	Q43: homo sapiens	Q44: leukapheresis	NUMBER ANSWERS PP		Clinical? Yes/no	experience with DCs and if yes, how many months/years?
	GOLD STANDARD	4c) Allogeneic/Autologous/Xenogeneic/Syngeneic	1e-i) Morphology, 3a-i) Morphology	2b-iii) Culture conditions - culture environment	4c) Allogeneic/Autologous/Xenogeneic/Syngeneic	1a) Species and strain	2b-ii) Cell concentration	2d) Antigen	3b) Functional assays	1f-ii) Cell numbers - viability, 3c-ii) Cell numbers - viability	1d) Cell separation process	1f-i) Cell numbers - absolute cell number, 2b-i) Culture conditions - cell number, 3c-i) Cell numbers - absolute cell number	2c) Differentiation/tolerization protocol	2b-iv) Culture conditions - culture medium	2a) Pre-culture conditions, 2e) Storage	1f-i) Cell numbers - absolute cell number, 3c-i) Cell numbers - absolute cell number	2a) Pre-culture conditions, 2e) Storage	1c) Tissue	4b) Purpose	3b) Functional assays	1f-ii) Cell numbers - viability, 3c-ii) Cell numbers - viability	1e-i) Phenotype - morphology, 3a-i) Phenotype - morphology	1e-iii) Phenotype - secreted molecules, 3a-iii) Phenotype - secreted molecules	1f-i) Cell numbers - absolute cell number, 2b-i) Culture conditions - cell number, 3c-i) Cell numbers - absolute cell number	2a) Pre-culture conditions	2b-v) Culture conditions - culture container	2b-ii) Culture conditions - cell concentration	1e-ii) Phenotype - cell surface and intracellular markers, 3a-ii) Phenotype - cell surface and intracellular markers	4a) Regulatory authority	2b-v) Culture conditions - culture container	2b-iv) Culture conditions - culture medium	1f-i) Cell numbers - absolute cell number, 2b-i) Culture conditions - cell number, 3c-i) Cell numbers - absolute cell number	2e) Storage	2d) Antigen	1b) Characteristics of the organism	1e-ii) Phenotype - cell surface and intracellular markers, 3a-ii) Phenotype - cell surface and intracellular markers	4a) Regulatory authority	1b) Characteristics of the organism	1e-iii) Phenotype - secreted molecules, 3a-iii) Phenotype - secreted molecules	2b-iii) Culture conditions - culture environment	1d) Cell separation process	2c) Differentiation/tolerization protocol	4b) Purpose	1a) Species and strain	1c) Tissue	60		no	5,5 years
1	2015-07-16 14:39:44	1a) , 1b) , 4c)	1e-i) , 2c) , 3a-i)	2b-iii)	1a) , 4c)	1a)	2b-ii)	2d)	3b)	1f-ii) , 3c-ii)	1d)	1f-i) , 2b-i) , 3c-i)	2b-iv)	2b-iv)	2e)	3a-ii)	2e)	1d)	4b)	3b)	1f-ii) , 3c-ii)	3a-i)	3b)	1f-i) , 2b-i)	2c)	2b-v)	2b-ii)	3a-ii)	4a)	2b-v)	2b-iv)	1f-i) , 3c-i)	2e)	1a)	1a)	3a-ii)	4a)	1b)	3b)	2b-iii)	2b-iii)	2b-iv)	4b)	1a)	1d)	55		no	yes, 18 years
2	2015-07-16 15:24:27	1a) , 2d)	1e-i) , 3a-i)	2b-iii)	1a) , 1b) , 1c) , 3b) , 4c)	1a)	2b-ii)	2c), 2d)	3b)	3a-ii)	1d)	1f-ii)	2c)	2b-iv)	2e)	3c-i) , 3c-ii)	2a)	1c)	4b)	3a-iii) , 3b)	1f-i), 1f-ii) , 3c-i) , 3c-ii)	3a-i)	3a-iii)	1f-i)	2c)	2b-v)	2b-iii) 2b-v)	3a-ii)	4a)	2b-v)	2b-iv)	1f-i)	3b)	2d)	1a) , 1b)	1e-ii) , 3a-ii)	4a)	1b)	3a-iii)	2b-iii)	2b-iii) , 2c)	2c)	4b)	1a)	1d)	60		no	yes, 1.5 years
3	2015-07-16 16:44:52	1a)	1d) , 2b-v)	2b-iii)	4c)	1a)	2b-i)	2d)	3b)	1f-ii) , 3c-ii)	1d)	3c-i)	2b-iv)	2b-iv) , 3b)	2e)	1d)	2e)	1c)	4b)	3b)	1f-ii), 3c-ii)	1e-i) , 3a-i)	1e-iii) , 3a-iii)	3c-i)	1d)	2b-v)	2b-v)	1e-ii) , 3a-ii)	4a)	2b-v)	2b-iv)	1f-i) , 3c-i)	2e)	2d)	1a)	1e-i) , 3a-i)	4a)	1b)	1e-iii) , 3a-iii)	2b-iii)	1d)	2b-iv)	4b)	1a)	1c)	54		no	5 years
4	2015-07-17 00:08:01	4c)	2b-v)	2b-iii)	4c)	1a)	2b-ii)	1b)	3b)	1f-ii) , 3c-ii)	1d)	1f-i) , 2b-i), 3c-i)	2c)	2b-iv)	2b-iv) , 2c)	1f-i) , 1f-ii) , 3c-i) , 3c-ii)	2a)	1c)	4b)	3b)	1f-ii), 3c-ii)	1e-i)	1e-iii) , 3a-iii)	1f-i) , 2b-i) , 3c-i)	2a)	2b-v)	2b-iv)	1e-ii) , 3a-ii)	4a)	2b-v)	2b-iv)	1f-i) , 2b-i) , 3c-i)	3b)	1b)	1b)	1e-ii) , 3a-ii)	4a)	1b)	1e-iii) , 3a-iii)	2b-iii) , 2e)	3b)	2c)	4b)	1a)	1c) , 1d)	62		No	No
5	2015-07-17 09:41:59	4c)	2b-v)	2b-iii)	4c)	1a)	2b-ii)	2d)	3b)	1f-ii) , 3c-ii)	1d) , 2c)	1f-i) , 2b-i) , 3c-i)	2b-iii)	2b-iv)	2a)	1f-i) , 3c-i)	2a)	1c)	4b)	3b)	3b)	1e-i)	3a-iii)	1f-i) , 2b-i) , 3c-i)	1d) , 2c)	2b-v)	2b-iii)	1e-ii) , 3a-ii)	4a)	2b-v)	2b-iv)	1f-i) , 2b-i) , 3c-i)	2e)	2d)	1a)	3a-ii)	4a)	1b)	3a-iii)	2b-iii)	1d)	2b-iv) , 2c)	4b)	1a)	1d)	56		No	Yes, 6 months
6	2015-07-20 16:39:38	1a) , 1b) , 4c)	1d) , 1e-i) 1e-ii) , 2b-v) , 2c) , 3a-i) , 3a-ii) , 3b)	2b-iii) , 2e)	1a) , 3b) , 4c)	1a)	1f-i) , 2b-i) , 2b-ii)	2d) , 3b) , 4c)	3b) , 4c)	1f-ii) , 3c-ii)	1d)	1d) , 1f-i) , 2b-i)	2b-ii) , 2c)	2b-iv) , 3b)	2e)	1d)	2a) , 2e)	1c)	4b)	3b)	1d)	1e-i) , 2b-iii) , 2b-iv) , 2b-v) , 3a-i)	3a-iii)	2b-i) , 3c-i)	1f-ii) , 2a)	1d)	2b-ii)	3a-ii)	4a)	2b-v)	2b-iv)	1f-i)	2e)	4c)	1a) , 1b)	3a-ii)	4a)	1b)	3a-iii)	2b-iii) , 2b-v) , 2e)	1d) , 2a)	2c) , 3b)	4b)	1a)	1c) , 1d)	75		Yes	8 years
7	2015-07-20 17:21:07	4c)	1e-i), 3a-i)	2b-iii)	4c)	1a)	2b-ii)	2d)	3b)	1f-ii) , 3c-ii)	1d)	1f-i) , 2b-i) , 3c-i)	2c)	2b-iv)	2a) , 2e)	1f-i) , 3c-i)	2a) , 2e)	1c)	4b)	3b)	1f-ii), 3c-ii)	1e-i) , 3a-i)	1e-iii) , 3a-iii)	1f-i) , 2b-i) , 3c-i)	1d)	2b-v)	2b-ii) , 2b-iv) , 2c)	1e-ii) , 3a-ii)	4a)	2b-v)	2b-iv)	1f-i) , 2b-i) , 3c-i)	2e)	1b)	3b)	1e-ii) , 3a-ii)	4a)	1b)	1e-iii) , 3a-iii)	2b-iii)	1d)	2c)	4b)	1a)	1c)	63		Clinical grade DC-yes	Yes, 10 years
8	2015-07-21 09:07:40	1a) , 1b) , 3b) , 4b) , 4c)	1c) , 1d) , 2b-iii) , 2b-iv) , 2b-v) , 3a-i)	1f-ii) , 2a) , 2b-iii) , 2c) , 3b) , 3c-ii)	1a) , 1b) , 3b) , 4b) , 4c)	1a)	2b-ii) , 2c) , 3b)	1c) , 2d) , 4b)	1a) , 3b) , 4b)	1f-ii) , 3c-ii)	1d)	1d) , 1f-i) , 2b-i) , 3b) , 3c-i)	2b-iii) , 2b-iv) , 2c)	2a) , 2b-iv) , 2c) , 3b)	2a) , 2b-iv) , 2c)	1f-i) , 2b-i) , 3c-i)	2e)	1c) , 2c) , 4a)	2c) , 4b)	3b)	1f-ii), 3c-ii)	1e-i) , 2b-v) , 2c) , 3a-i)	1e-iii) , 3a-iii)	1f-i) , 2b-i) , 2e) , 3c-i)	1c) , 1d) , 2c) , 4b)	2c)	2a) , 2b-iv) , 2b-v) , 2c)	1d) , 1e-ii) , 3a-ii)	4a)	2b-v)	2b-iv)	1d) , 1f-i) , 2b-i) , 3c-i)	2a) , 3b)	1b) , 2d)	1a)	1e-ii) , 3a-ii)	4a)	1b)	1e-iii) , 3a-iii)	2b-iii) , 3b)	1d) , 2a)	2c)	4b)	1a)	1c) , 1d)	111		No	6 months
9	2015-07-28 19:45:03	1a) , 4a) , 4c)	1e-i) , 2b-iii) , 3a-i)	2b-iii)	1b) , 4c)	1a)	2b-ii)	2d) , 3b)	2d) , 3b)	1f-ii) , 3c-ii)	1d)	1f-i) , 2b-i) , 3c-i)	2b-iv) , 2c)	2a) , 2b-iv)	2a)	1f-i) , 3b) , 3c-i)	2a) , 2e)	1c)	4b)	3b)	3a-ii)	1e-i) , 3a-i)	1e-iii) , 3a-iii)	1f-i) , 2b-i) , 3c-i)	1d) , 2c)	2b-v)	2b-v)	1e-ii) , 3a-ii)	4a)	2b-v)	2b-iv)	1f-i) , 2b-i) , 3c-i)	2e)	1b)	3b)	1e-ii) , 3a-ii)	4a)	1b)	1e-iii) , 3a-iii)	2b-iii)	2a) , 2b-iii) , 2b-v) , 2e)	2b-iv) , 2c)	4b)	1a)	1c)	71		yes	yes, 3 years
10	2015-08-03 09:45:49	4c)	1e-i) , 3a-i)	2b-iii)	4c)	1a)	2b-ii)	2d)	3b)	1f-ii) , 3c-ii)	1d)	1c) , 2b-i)	2c)	2b-iv)	2a)	1f-i) , 3c-i)	2a) , 2e)	1c)	4b)	3b)	1f-ii) , 3c-ii)	1e-i) , 3a-i)	1e-iii) , 3a-iii)	2b-i)	2a)	2b-v)	2b-ii)	1e-ii) , 3a-ii)	4a)	2b-v)	2b-iv)	2b-i)	2e)	2d)	1a)	1e-ii) , 3a-ii)	4a)	1b)	1e-iii) , 3a-iii)	2b-iii)	1d)	2c)	4b)	1a)	1c)	55		No	6 years
11	2015-08-03 10:37:24	1a) , 4c)	1e-i) , 3a-i) , 3b)	2b-iii)	3b) , 4c)	1a)	2b-ii)	1b)	3b)	1f-ii) , 3c-ii)	1d)	1f-i) , 3c-i)	2c)	2b-iv)	2a)	1f-i) , 3c-i)	2a) , 2e)	1c)	4b)	3b)	1f-ii), 3c-ii)	1e-i) , 3a-i)	1e-iii) , 3a-iii) , 3b)	1f-i) , 3c-i)	2a)	2b-v)	2b-ii)	3a-ii)	4a)	2b-v)	2b-iv)	1f-i) , 3c-i)	2e)	1b)	1a)	3a-ii)	4a)	1b)	1e-iii) , 3a-iii) , 3b)	2b-iii)	1d)	2c)	4b)	1a)	1c)	60		No	21 months
12	2015-08-03 15:48:08	1a)	1d)	2b-iii)	1a)	1a)	2b-ii)	2d)	3b)	3c-ii)	1d)	1f-i)	2c)	2b-iv)	1d)	3c-ii)	2e)	1c)	4b)	3b)	1f-ii) , 3c-ii)	1e-i) , 3a-i)	3b)	1f-i) , 3c-i)	2a)	2b-v)	2b-iv)	3a-ii)	4a)	2b-v)	2b-iv)	1f-i) , 3c-i)	2e)	2d)	1a)	1e-ii)	4a)	1b)	3a-iii)	2b-iii)	1d)	2c)	4b)	1a)	1c)	48		no	yes, 1 year
13	2015-08-03 16:05:42	4c)	1d)	2b-i)	4c)	1a)	2b-ii)	2d)	3b)	1f-ii)	1d)	2b-i)	2c)	2b-iv)	2e)	3c-i)	2e)	1c)	2c)	3b)	3c-i)	3a-i)	3a-iii)	1f-i)	2c)	2c)	2b-iv)	3a-ii)	4a)	2b-v)	2b-iv)	1f-i)	2e)	4a)	1b)	3a-ii)	4a)	1b)	3a-iii)	2b-iii)	1d)	2c)	4b)	1a)	1d)	44		no	5 years
14	2015-08-04 11:48:17	4c)	1e-ii) , 3b)	2b-iii)	4c)	1a)	1f-i)	2c) , 2d)	4c)	1f-ii) , 3c-ii)	1d)	1f-i) , 3c-i)	2c)	2b-iv)	2b-iv) , 2c)	1d) , 1f-i) , 3c-i)	2a) , 2e)	1c)	4b)	3b)	1f-ii) , 3c-ii)	3b)	3b)	1f-i) , 3c-i)	1d) , 2a) , 2c)	2b-v)	2b-iv)	1e-ii) , 3a-ii)	4a)	2b-v)	2b-iv)	1f-i) , 3c-i)	2e)	1b) , 2a) , 2d)	1a)	1e-ii) , 3a-ii)	4a)	1b)	1e-iii) , 3a-iii) , 3b)	2b-iii)	1d)	2b-iv)	4b)	1a)	1c)	63		no	6 years
15	2015-08-05 11:31:57	4c)	1e-i) , 2b-v) , 3a-i) , 3b)	2a) , 2b-iii) , 2e)	4c)	1a)	2a) , 2b-ii)	2b-iv) , 2c) , 2d)	3b)	1f-ii) , 3c-ii)	1d)	2b-i)	2b-iv) , 2c)	2b-iv)	2a) , 2b-iv) , 2c) , 2e)	1f-i) , 3c-i)	2a) , 2e)	1c)	4b)	3b)	1f-ii) , 3c-ii)	1e-i) , 3a-i)	1e-iii) , 3a-iii)	1f-i) , 2a) , 2b-i) , 2b-ii) , 3c-i)	1d)	2b-v)	2b-ii)	1e-ii) , 3a-ii)	4a)	2b-v)	2a) , 2b-iv)	1f-i) , 2b-i) , 2b-ii) , 3c-i)	2a) , 2c) , 3b)	3b)	1b)	1e-ii) , 3a-ii)	4a)	1b)	1e-iii) , 3a-iii)	2b-iii)	1e-i) , 3a-i)	2c)	4b)	1a)	1d)	74		no	4 years
16	2015-08-06 14:40:49	4c)	1e-i) , 2c) , 3a-i) , 3b)	2b-iii)	4c)	1a)	1f-i) , 2b-i) , 2b-ii) , 3c-i)	3b)	3b) , 4c)	1f-ii) , 3c-ii)	1d)	1f-i) , 2b-i) , 3c-i)	2c)	2b-iv)	2b-iv) , 2c)	3c-i)	2e)	1c)	4b)	3b)	1f-ii)	1e-i)	1e-iii)	1f-i)	2c)	2b-v)	2b-iii)	1e-ii)	4a)	2b-v)	2b-iv)	1f-i)	2a) , 2b-iii)	2d)	1a)	1e-ii)	4a)	1b)	1e-iii)	2b-iii)	1d) , 2a)	2c)	4b)	1a)	3b)	57		no	Yes; 15 years
17	2015-08-09 12:12:49	4c)	1e-i)	2b-iii)	4c)	1a)	2b-ii)	2d)	3b)	1f-ii)	1d)	1f-i)	2b-iv)	2b-iv)	2b-iv)	1f-i)	2e)	1c)	4b)	3b)	1f-ii)	3a-i)	3a-iii)	1f-i)	2c)	2c)	2b-iv)	1e-ii)	4a)	2b-v)	2b-iv)	1f-i)	2c)	1a)	1a)	1e-ii)	4a)	1b)	1e-iii)	2b-iii)	2b-iii)	2c)	4b)	1a)	2a)	44		No	Yes; 2 years
18	2015-08-10 07:22:24	4c)	1d)	2b-iii)	4c)	1a)	2b-ii)	3b)	4c)	1f-ii) , 3c-ii)	1d)	1f-i) , 3c-i)	2c)	2b-iv)	2a)	2b-i) , 3c-i)	2e)	1c)	4b)	3b)	1f-ii) , 3c-ii)	1e-i) , 3a-i)	3a-iii)	1f-i) , 3c-i)	2c)	2b-v)	2b-iv)	3a-ii)	4a)	2b-v)	2b-iv)	2b-i) , 3c-i)	2e)	3b)	1b)	3a-ii)	4b)	1b)	3a-iii)	2e)	2a)	2c)	4b)	1a)	1c)	50		yes	15 months
19	2015-08-13 13:58:47	4c)	1e-i) , 3a-i)	2b-iii)	4c)	1a)	2b-ii)	2d)	4c)	3c-ii)	1d)	2b-i)	2b-iii) , 2c)	2b-iv)	2b-iv)	1f-i)	2e)	2a)	2c)	3b)	3c-ii)	1e-i) , 3a-i)	1e-iii) , 3a-iii)	2b-i)	2c)	2c)	2b-iv) , 2b-v)	1e-ii) , 3a-ii)	4a)	2b-v)	2b-iv)	2b-ii)	2e)	2d)	1a)	1e-ii)	4a)	1b)	1e-iii) , 3a-iii)	2b-iii)	1e-i)	3a-iii)	4b)	1a)	1d)	51		no	7 years
20	2015-08-17 15:58:14	4c)	2b-v)	2b-iii)	4c)	1a)	1f-i) , 2b-i)	2d)	3b)	1f-ii) , 3c-ii)	1d)	1f-i) , 3c-i)	2c)	2b-iv)	2b-iv)	1f-i) , 3c-i)	2e)	1c)	4b)	3b)	1f-ii) , 3c-ii)	1e-i) , 3a-i)	3b)	1f-i) , 3c-i)	2c)	2b-v)	2c)	1e-ii) , 3a-ii)	4a)	2b-v)	2b-iv)	1f-i) , 3c-i)	2e)	2d)	1b)	1e-ii) , 3a-ii)	4a)	1b)	3b)	2b-iii)	2b-iii)	2c)	4b)	1a)	1c)	54		No	Yes - 10months
21	2015-08-17 16:46:40	3b) , 4c)	1e-i) , 3a-i)	2b-iii)	3b) , 4c)	1a)	2b-ii)	2d) , 3b)	3b)	1f-ii) , 3c-ii)	1d)	1f-i) , 2b-i) , 3c-i)	2c)	2b-iv)	2a)	1f-i) , 2b-i) , 3c-i)	2e)	1c)	4b)	3b)	1f-ii) , 3c-ii)	3a-i)	3a-iii)	1f-i) , 2b-i) , 3c-i)	2a)	2b-v)	2b-iv)	3a-ii)	4a)	2b-v)	2b-iv)	1f-i) , 2b-i) , 3c-i)	2a)	2d) , 3b)	1b)	3a-ii)	4a)	1b)	3a-iii)	2b-iii)	1d)	2c)	4b)	1a)	1c)	59		NO	2.5 years
22	8/17/2015 18:15:15	1a) , 4c)	2b-v)	2b-iii)	3b) , 4c)	1a)	2b-ii) , 3a-ii) , 3c-i)	2b-iv)	3b)	1f-ii) , 3c-ii)	1d)	1f-i) , 3c-i)	2c)	2b-iv) , 2c)	2b-iv)	2b-i)	2e)	1c)	4b)	3b)	1f-ii) , 3c-ii)	3a-i)	3a-iii) , 3b)	4c)	1d)	2b-v)	2b-ii) , 2d)	1e-ii) , 3a-ii)	4a)	2b-v) , 3b)	2b-iv) , 3b)	4c)	3b)	4c)	1b)	1e-ii) , 3a-ii), 3b)	4a)	1b)	1e-iii) , 3a-iii) , 3b)	2b-iii) , 2e) , 3b)	1d)	2c)	4b)	1a)	1c)	63		yes	yes, 5 months
	# Gold Standard	12	6	18	13	22	14	10	15	21	21	18	13	17	12	10	22	19	19	21	17	19	16	19	5	17	5	21	22	21	20	18	14	8	7	20	21	22	17	17	10	15	22	22	11
	# Gold + more	7	6	3	8	0	6	7	4	0	1	3	5	5	2	7	0	1	1	1	1	2	2	2	2	0	2	1	0	1	2	2	0	3	2	1	0	0	3	4	3	3	0	0	3
	# both	19	12	21	21	22	20	17	19	21	22	21	18	22	14	17	22	20	20	22	18	21	18	21	7	17	7	22	22	22	22	20	14	11	9	21	21	22	20	21	13	18	22	22	14
	# No Gold Standard	3	10	1	1	0	2	5	3	1	0	1	4	0	8	5	0	2	2	0	4	1	4	1	15	5	15	0	0	0	0	2	8	11	13	1	0	0	2	1	9	4	0	0	7
		Total Q1 (%):	Total Q2 (Normalized) (%):	Total Q3 (%)	Total Q4 (%)	Total Q5 (%)	Total Q6 (%)	Total Q7(%)	Total Q8 (%)	Total Q9 (Normalized)(%)	Total Q10 (%)	Total Q11 (Normalized) (%)	Total Q12 (%)	Total Q13 (%)	Total Q14 (Normalized) (%)	Total Q15 (Normalized) (%)	Total Q16 (Normalized) (%)	Total Q17 (%)	Total Q18 (%)	Total Q19 (%)	Total Q20 (Normalized) (%)	Total Q21 (Normalized) (%)	Total Q22 (Normalized) (%)	Total Q23 (Normalized) (%)	Total Q24 (%)	Total Q25 (%)	Total Q26 (%)	Total Q27 (Normalized)(%)	Total Q28 (%)	Total Q29 (%)	Total Q30 (%)	Total Q31 (Normalized)(%)	Total Q32 (%)	Total Q33 (%)	Total Q34 (%)	Total Q35 (Normalized)(%)	Total Q36 (%)	Total Q37 (%)	Total Q38 (%)	Total Q39 (%)	Total Q40 (%)	Total Q41 (%)	Total Q42 (%)	Total Q43 (%)	Total Q44 (%)
	% Gold Standard	54.5455	27.2727	81.8182	59.0909	100	63.6364	45.4545	68.1818	95.4545	95.4545	81.8182	59.0909	77.2727	54.5455	45.4545	100	86.3636	86.3636	95.4545	77.2727	86.3636	72.7273	86.3636	22.7273	77.2727	22.7273	95.4545	100	95.4545	90.9091	81.8182	63.6364	36.3636	31.8182	90.9091	95.4545	100	77.2727	77.2727	45.4545	68.1818	100	100	50
	% both	86.3636	54.5455	95.4545	95.4545	100	90.9091	77.2727	86.3636	95.4545	100	95.4545	81.8182	100	63.6364	77.2727	100	90.9091	90.9091	100	81.8182	95.4545	81.8182	95.4545	31.8182	77.2727	31.8182	100	100	100	100	90.9091	63.6364	50	40.9091	95.4545	95.4545	100	90.9091	95.4545	59.0909	81.8182	100	100	63.6364
NORMALIZATION:			1e-i) Morphology, 3a-i) Morphology							1f-ii) Cell numbers - viability, 3c-ii) Cell numbers - viability		1f-i) Cell numbers - absolute cell number, 2b-i) Culture conditions - cell number, 3c-i) Cell numbers - absolute cell number			2a) Pre-culture conditions, 2e) Storage	1f-i) Cell numbers - absolute cell number, 3c-i) Cell numbers - absolute cell number					1f-ii) Cell numbers - viability, 3c-ii) Cell numbers - viability	1e-i) Phenotype - morphology, 3a-i) Phenotype - morphology	1e-iii) Phenotype - secreted molecules, 3a-iii) Phenotype - secreted molecules	1f-i) Cell numbers - absolute cell number, 2b-i) Culture conditions - cell number, 3c-i) Cell numbers - absolute cell number				1e-ii) Phenotype - cell surface and intracellular markers, 3a-ii) Phenotype - cell surface and intracellular markers				1f-i) Cell numbers - absolute cell number, 2b-i) Culture conditions - cell number, 3c-i) Cell numbers - absolute cell number				1e-ii) Phenotype - cell surface and intracellular markers, 3a-ii) Phenotype - cell surface and intracellular markers			1e-iii) Phenotype - secreted molecules, 3a-iii) Phenotype - secreted molecules
				44	0	3	6	35
					0-25	25-50	50-75	75-100
[truncated: 2 more columns]

## Sheet: Explanation data form responses
1	Participants were asked the following question (C1 to AT1 in 'Form responses' sheet):
	Q1	xenogenic
	Q2	adhesive
	Q3	37ºC in a 5% CO2 atmosphere
	Q4	allogeneic
	Q5	rattus norvegicus
	Q6	0.5*10^6 cells/ml at start of culture
	Q7	tetanus toxoid
	Q8	Alloresponse
	Q9	90-95% viable by FACS (7-AAD/Annexin-5)
	Q10	immunomagnetic separation
	Q11	200x10^6
	Q12	On day 4, cells were treated with a cGMP cocktail (TNF-α (1000 U/ml), IL-1β (10 ng/ml) and PGE2 (1μM)
	Q13	X-VIVO-15 with 2% autologous serum.
	Q14	PBS and 2% human serum albumin for 2 hours
	Q15	1x10^7 by FACS
	Q16	cells were frozen at -140°C for <6 months
	Q17	peripheral blood
	Q18	induction of tolerance in autoimmunity
	Q19	migration to CCL21 in 96 transwell plate
	Q20	90% DAPI-positive cells
	Q21	adherent via long or short protrusions
	Q22	IL-10 (ELISA)
	Q23	4x10^7
	Q24	Cell extraction and start differentiation/tolerization process is performed at the same day
	Q25	Miltenyi cell differentiation bags 500 ml
	Q26	1 ml of culture medium/well
	Q27	CD86
	Q28	Spanish regulatory agency (AEMPS)
	Q29	80 cm2 culture flask
	Q30	IMDM and 5% FSC, penicillin & streptomycin (5.10^4 U) and 50 µM 2-ME
	Q31	5*10^7
	Q32	Cells are kept on ice in pbs for < 2 hours prior to injection
	Q33	CMV
	Q34	mice were obtained from Jackson Laboratories
	Q35	CD11c
	Q36	Approved by Dutch Central Committee on Research Involving Human Subjects
	Q37	age
	Q38	TNF-a (ELISA)
	Q39	CO2 incubator
	Q40	Adherence to plastic, 2h at 37ºC.
	Q41	Introduce il10 on day five
	Q42	arrest the autoimmune attack to the insulin producing cells in type 1 diabetes.
	Q43	homo sapiens
	Q44	leukapheresis
2	Participants could choose from the following answers:
	1a)	Species and strain
	1b)	Characteristics of the organism
	1c)	Tissue
	1d)	Cell separation process
	1e-i)	Phenotype - morphology
	1e-ii)	Phenotype - cell surface and intracellular markers
	1e-iii)	Phenotype - secreted molecules
	1f-i)	Cell numbers - absolute cell number
	1f-ii)	Cell numbers - viability
	2a)	Pre-culture conditions
	2b-i)	Culture conditions - cell number
	2b-ii)	Culture conditions - cell concentration
	2b-iii)	Culture conditions - culture environment
	2b-iv)	Culture conditions - culture medium
	2b-v)	Culture conditions - culture container
	2c)	Differentiation/tolerization protocol
	2d)	Antigen
	2e)	Storage
	3a-i)	Phenotype - morphology
	3a-ii)	Phenotype - cell surface and intracellular markers
	3a-iii)	Phenotype - secreted molecules
	3b)	Functional assays
	3c-i)	Cell numbers - absolute cell number
	3c-ii)	Cell numbers - viability
	4a)	Regulatory authority
	4b)	Purpose
	4c)	Allogeneic/Autologous/Xenogeneic/Syngeneic
3	Rows 4-25 show the results of the 44 questions of 22 participants
4	Row 1 shows the Gold Standard as given by the primary authors of the MITAP document
5	Row 27 gives the number of answers given that only consists of the Gold Standard
	Row 28 gives the number of answers given that consists of the Gold Standard plus another answer
	Row 29 gives the number of answers given that is either only the Gold Standard or the Gold Standard plus another answer (the sum of row 27 and 28)
6	Row 33 gives the % of the answers that were only the Gold Standard
	Row 34 gives the % of the answers that were 1) only the Gold Standard + 2) the Gold Standard plus one or more additional answers
		0-25%
		25-50%
		50-75%
		75-100%
7	Normalization: often more than one correct (Gold Standard) answer could be given (e.g. Q2). In this case, all the correct answers given
	by the participant were normalised to the first correct answer of the Gold Standard
